# Supplementary material for: Maternal age and child morbidity: A Danish national cohort study
Source: PLOS journal article supplement (doi:10.1371/journal.pone.0174770), 2017-04-05
Supplement: S1 (10.1371/journal.pone.0174770.s001) [file journal.pone.0174770.s001]

# Maternal Age and Child Morbidity: a Danish National C

Authors: MM Hviid, CW Skovlund, L Mørch, Øjvind Lidegaard

**Table S1. Summary of main diagnosis groups and ICD-10 codes**

| <b>Main diagnosis group</b>          | <b>ICD-10 codes</b> |
|--------------------------------------|---------------------|
| Bacterial infections                 | A00-A99             |
| Non-bacterial infections             | B00-B99             |
| Malignant diseases                   | C00-C97             |
| Benign tumors                        | D00-D49             |
| Anemia                               | D50-D89             |
| Endocrine disorders                  | E00-E90             |
| Mental disorders                     | F00-F99             |
| Cerebral diseases                    | G00-G99             |
| Eye diseases                         | H00-H59             |
| Ear diseases                         | H60-H95             |
| Heart diseases                       | I00-I52             |
| Circulatory diseases                 | I60-I99             |
| Airway diseases                      | J00-J99             |
| Gastro- intestinal diseases          | K00-K93             |
| Dermatological disorders             | L00-L99             |
| Rheumatic diseases                   | M00-M99             |
| Kidney, urinary and genital diseases | N00-N99             |
| Neonatal diseases                    | P00-P96             |
| Congenital malformations             | Q00-Q99             |

## Cohort Study
